# Supplementary material for: Selective Inhibitors of the Inducible Nitric Oxide Synthase as Modulators of Cell Responses in LPS-Stimulated Human Monocytes
Source: MDPI journal article supplement (doi:10.3390/molecules26154419), 2021-07-22
Supplement: s1 [file s1]

## Selective inhibitors of the inducible Nitric Oxide Synthase as modulators of cell responses in LPS-stimulated human monocytes

Marialucia Gallorini<sup>1</sup>, Monica Rapino<sup>2</sup>, Helmut Schweikl<sup>3</sup>, Amelia Cataldi<sup>1</sup>, Rosa Amoroso<sup>1\*</sup>, Cristina Maccallini<sup>1</sup>

1 Department of Pharmacy, University "G. d'Annunzio" Chieti-Pescara, Via dei Vestini 31, 66100 Chieti, Italy;

2 Genetic Molecular Institute of CNR, Unit of Chieti, "G. d'Annunzio" University, Via dei Vestini 31, 66100, Chieti-Pescara, Italy

3 Department of Conservative Dentistry and Periodontology, University Hospital Regensburg, D-93042 Re-gensburg, Germany

\* Correspondence: rosa.amoroso@unich.it

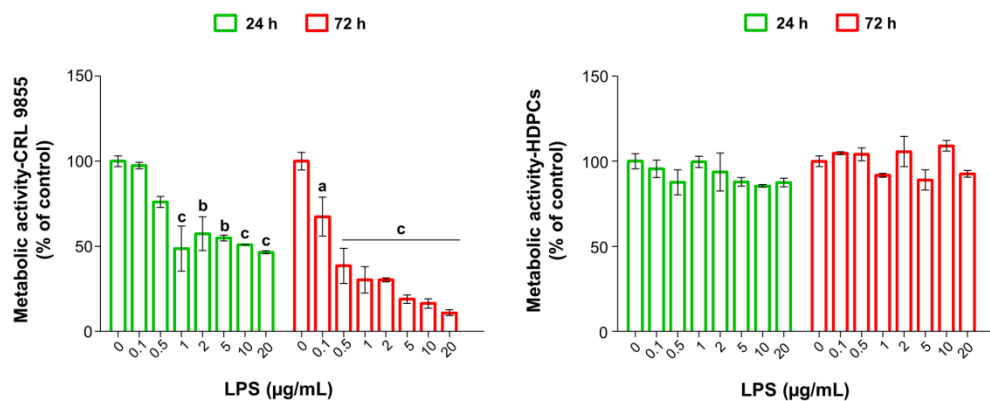

**Figure S1. Metabolic activity in the presence of increasing concentrations of LPS in CRL 9855 human monocytes and HDPCs after 24 and 72 h.** The bar graphs represent the percentage of metabolically active cells in the presence of LPS (0-20 µg/mL). The control is represented by untreated cultures and is set as 100%. a =  $p < 0.01$ , b =  $p < 0.001$  and c =  $p < 0.0001$  between LPS-treated cells and the untreated control.

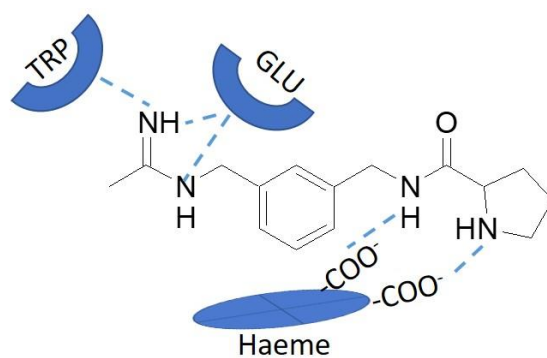

**Figure S2. Schematic drawing of the most important interactions of CM544 into the iNOS catalytic site.** The CM544 acetamidine moiety interacts by a bidentate hydrogen bond (dotted lines) with a GLU and a TRP residues of the iNOS binding site. The aromatic ring is positioned atop one of the enzyme haeme pyrrole rings. The haeme propionate arms interact with the amide N-H group and the proline amino group by means of further hydrogen bonds.
